# Supplementary material for: Transcriptomic studies reveal a key metabolic pathway contributing to a well-maintained photosynthetic system under drought stress in foxtail millet (Setaria italica L.)
Source: PeerJ. 2018 May 8;6:e4752. doi: 10.7717/peerj.4752 (PMC5947103; doi:10.7717/peerj.4752)
Supplement: Table S1 [file peerj-06-4752-s001.xlsx]

## Sheet: Table S1
Table S1. Descriptive statistical analysis of RNA-seq of 18 samples.
Summary	Min	Max	Total	Average
Total Raw reads	41852554	56422994	855140406	4.75078e+07
Total clean reads	40133150	54294190	817220628	45401146
Total clean reads/total Raw reads	0.958918	0.962271	0.955657	0.955657
Total clean bases	6019972500	8144128500	122583094200	6810171900
GC content	0.5505	0.5767	-	0.562994
Q20	0.9403	0.9502	-	0.94575
Q30	0.8638	0.8822	-	0.873522
Total mapped reads	37376699	51211362	764657142	4.2481e+07
Total mapped reads/Total clean reads	0.931317	0.94322	0.93568	0.93568
