# Supplementary material for: Transcriptomic studies reveal a key metabolic pathway contributing to a well-maintained photosynthetic system under drought stress in foxtail millet (Setaria italica L.)
Source: PeerJ. 2018 May 8;6:e4752. doi: 10.7717/peerj.4752 (PMC5947103; doi:10.7717/peerj.4752)
Supplement: Table S6 [file peerj-06-4752-s006.xlsx]

## Sheet: Table S6
Table S6. GO enrichment analysis of DEGs in M79 and H1 after drought treatment.
GO term	Description	Ontology	Number in input list	FDR
GO:0016020	membrane	C	253	1.27×10-7
GO:0043531	ADP binding	F	110	2.18×10-14
GO:0032559	adenyl ribonucleotide binding	F	357	2.48×10-13
GO:0003824	catalytic activity	F	1101	3.27×10-13
GO:0030554	adenyl nucleotide binding	F	357	3.42×10-13
GO:0004672	protein kinase activity	F	273	3.54×10-13
GO:0016773	phosphotransferase activity, alcohol group as acceptor	F	291	7.02×10-13
GO:0016301	kinase activity	F	293	8.95×10-13
GO:0000166	nucleotide binding	F	414	7.08×10-12
GO:1901265	nucleoside phosphate binding	F	414	7.08×10-12
GO:0036094	small molecule binding	F	417	1.69×10-11
GO:0097367	carbohydrate derivative binding	F	382	3.22×10-11
GO:0032553	ribonucleotide binding	F	377	6.03×10-11
GO:0001883	purine nucleoside binding	F	372	1.20×10-10
GO:0032550	purine ribonucleoside binding	F	372	1.20×10-10
GO:0032555	purine ribonucleotide binding	F	372	1.20×10-10
GO:0017076	purine nucleotide binding	F	373	1.38×10-10
GO:0032549	ribonucleoside binding	F	372	1.94×10-10
GO:0001882	nucleoside binding	F	372	2.08×10-10
GO:0043168	anion binding	F	410	3.37×10-10
GO:0016772	transferase activity, transferring phosphorus-containing groups	F	311	6.74×10-10
GO:0016740	transferase activity	F	491	2.12×10-8
GO:0043167	ion binding	F	627	1.85×10-6
GO:0005524	ATP binding	F	251	2.60×10-3
GO:0016491	oxidoreductase activity	F	244	1.83×10-2
GO:0006468	protein phosphorylation	P	272	7.98×10-12
GO:0016310	phosphorylation	P	276	2.44×10-11
GO:0006796	phosphate-containing compound metabolic process	P	317	1.02×10-8
GO:0006793	phosphorus metabolic process	P	317	1.27×10-8
GO:0006464	cellular protein modification process	P	310	6.72×10-8
GO:0036211	protein modification process	P	310	6.72×10-8
GO:0043412	macromolecule modification	P	312	3.73×10-7
