# Supplementary material for: Transcriptomic studies reveal a key metabolic pathway contributing to a well-maintained photosynthetic system under drought stress in foxtail millet (Setaria italica L.)
Source: PeerJ. 2018 May 8;6:e4752. doi: 10.7717/peerj.4752 (PMC5947103; doi:10.7717/peerj.4752)
Supplement: Table S7 [file peerj-06-4752-s007.xlsx]

## Sheet: Table S7
Table S7. GO enrichment analysis of DEGs that were up-regulated in all three drought-treated cultivars.
GO term	Description	Ontology	Number in input list	FDR
GO:0016020	membrane	C	146	7.13×10-3
GO:0031224	intrinsic component of membrane	C	81	2.73×10-2
GO:0020037	heme binding	F	76	2.06×10-7
GO:0003824	catalytic activity	F	579	3.01×10-5
GO:0005506	iron ion binding	F	54	2.90×10-4
GO:0003824	catalytic activity	F	685	4.05×10-7
GO:0016740	transferase activity	F	301	8.10×10-4
GO:0004672	protein kinase activity	F	151	3.25×10-3
GO:0016301	kinase activity	F	162	6.54×10-3
GO:0016773	phosphotransferase activity, alcohol group as acceptor	F	159	1.22×10-2
GO:0016798	hydrolase activity, acting on glycosyl bonds	F	85	2.95×10-7
GO:0004553	hydrolase activity, hydrolyzing O-glycosyl compounds	F	79	4.65×10-7
GO:0016491	oxidoreductase activity	F	239	6.88×10-7
GO:0046906	tetrapyrrole binding	F	106	7.03×10-7
GO:0005506	iron ion binding	F	81	1.60×10-5
GO:0016705	oxidoreductase activity, acting on paired donors, with incorporation or reduction of molecular oxygen	F	73	2.79×10-3
GO:0016740	transferase activity	F	301	8.10×10-4
GO:0004672	protein kinase activity	F	151	3.25×10-3
GO:0016301	kinase activity	F	162	6.54×10-3
GO:0016773	phosphotransferase activity, alcohol group as acceptor	F	159	1.22×10-2
GO:0001071	nucleic acid binding transcription factor activity	F	65	6.20×10-4
GO:0003700	sequence-specific DNA binding transcription factor activity	F	65	6.20×10-4
GO:0043565	sequence-specific DNA binding	F	37	3.29×10-2
GO:0030170	pyridoxal phosphate binding	F	20	3.40×10-2
GO:0072330	monocarboxylic acid biosynthetic process	P	24	1.52×10-2
GO:0006633	fatty acid biosynthetic process	P	23	2.43×10-2
GO:0055114	oxidation-reduction process	P	146	2.33×10-2
