# Supplementary material for: Transcriptomic studies reveal a key metabolic pathway contributing to a well-maintained photosynthetic system under drought stress in foxtail millet (Setaria italica L.)
Source: PeerJ. 2018 May 8;6:e4752. doi: 10.7717/peerj.4752 (PMC5947103; doi:10.7717/peerj.4752)
Supplement: Table S9 [file peerj-06-4752-s009.xlsx]

## Sheet: Table S9
Table S9. DEGs that were expressed in all three drought-treated cultivars.
Gene ID	M79_DR VS M79_CK			E1_DR VS E1_CK			H1_DR VS H1_CK			Annotation
	log2(FC)	P_value	Q_value	log2(FC)	P_value	Q_value	log2(FC)	P_value	Q_value
Seita.2G050200	3.10215	5.00×10-5	7.18×10-4	3.12479	9.50×10-4	5.32×10-3	2.77862	5.70×10-3	4.77×10-2	LTPL78 - Protease inhibitor/seed storage/LTP family protein precursor, expressed
Seita.7G132700	2.57855	5.00×10-5	7.18×10-4	1.92011	5.00×10-5	4.10×10-4	2.61468	5.00×10-5	1.07×10-3	amino acid transporter, putative, expressed
Seita.9G243700	2.01893	5.00×10-5	7.18×10-4	2.00332	5.00×10-5	4.10×10-4	3.29228	5.00×10-5	1.07×10-3	universal stress protein domain containing protein, putative, expressed
Seita.2G179500	1.29409	5.40×10-3	3.24×10-2	1.86341	5.00×10-5	4.10×10-4	1.93329	5.00×10-5	1.07×10-3	hydroxyproline-rich glycoprotein family protein, putative, expressed
Seita.2G128600	5.68819	5.00×10-5	7.18×10-4	2.30641	5.00×10-5	4.10×10-4	1.84876	1.00×10-4	1.92×10-3	dehydrodolichyl diphosphate synthase, putative, expressed
Seita.1G136700	3.04809	5.00×10-5	7.18×10-4	1.96045	1.50×10-4	1.10×10-3	2.40198	7.00×10-4	9.37×10-3	DUF538 domain containing protein, putative, expressed
Seita.1G004600	2.37084	5.00×10-5	7.18×10-4	1.0874	5.00×10-5	4.10×10-4	6.13915	5.00×10-5	1.07×10-3	glycosyl hydrolases, putative, expressed
Seita.3G157400	3.16205	5.00×10-5	7.18×10-4	1.69871	1.50×10-4	1.10×10-3	2.66507	1.60×10-3	1.82×10-2	LTPL153 - Protease inhibitor/seed storage/LTP family protein precursor, expressed
Seita.7G166500	2.42069	9.00×10-4	8.11×10-3	2.02228	7.55×10-3	2.96×10-2	4.03208	3.50×10-3	3.27×10-2	no apical meristem protein, putative, expressed
Seita.2G324800	1.61996	5.00×10-5	7.18×10-4	2.39287	5.00×10-5	4.10×10-4	2.83055	5.00×10-5	1.07×10-3	UDP-glucoronosyl and UDP-glucosyl transferase domain containing protein, expressed
Seita.7G045400	1.08114	1.55×10-3	1.26×10-2	1.18564	5.00×10-5	4.10×10-4	1.95734	5.00×10-5	1.07×10-3	xylosyltransferase, putative, expressed
Seita.5G010100	2.33907	5.00×10-5	7.18×10-4	1.96635	5.00×10-5	4.10×10-4	1.71454	5.00×10-5	1.07×10-3	cytochrome P450, putative, expressed
Seita.4G099200	4.4653	5.00×10-5	7.18×10-4	2.75952	5.00×10-5	4.10×10-4	2.23081	5.00×10-5	1.07×10-3	OsFtsH6 FtsH protease, homologue of AtFtsH6, expressed
Seita.2G436000	5.87801	5.00×10-5	7.18×10-4	2.71364	5.00×10-5	4.10×10-4	1.50768	5.00×10-5	1.07×10-3	no apical meristem protein, putative, expressed
Seita.2G402800	4.43376	9.50×10-4	8.45×10-3	2.78084	8.50×10-3	3.25×10-2	2.11717	2.60×10-3	2.64×10-2	RNA recognition motif containing protein, putative, expressed
Seita.2G053800	6.3106	4.50×10-4	4.65×10-3	1.90817	5.05×10-3	2.14×10-2	2.16279	1.95×10-3	2.12×10-2	early light-induced protein, chloroplast precursor, putative, expressed
Seita.7G121700	2.85006	9.50×10-4	8.45×10-3	2.61392	5.00×10-5	4.10×10-4	3.35035	5.00×10-4	7.22×10-3	ethylene-insensitive 3, putative, expressed
Seita.4G181500	1.27183	5.00×10-5	7.18×10-4	1.3945	5.00×10-5	4.10×10-4	1.21337	2.50×10-4	4.08×10-3	ABC-2 type transporter, putative, expressed
Seita.3G218800	1.79668	5.00×10-5	7.18×10-4	2.21024	5.00×10-5	4.10×10-4	2.71237	5.00×10-5	1.07×10-3	protein phosphatase 2C, putative, expressed
Seita.9G544600	3.20531	5.00×10-5	7.18×10-4	2.99353	5.00×10-5	4.10×10-4	3.65265	5.00×10-5	1.07×10-3	beta-amylase, putative, expressed
Seita.7G242500	1.03751	2.15×10-3	1.62×10-2	1.59417	5.00×10-5	4.10×10-4	1.25419	3.00×10-4	4.76×10-3	CPuORF12 - conserved peptide uORF-containing transcript, expressed
Seita.5G251200	2.09648	5.00×10-5	7.18×10-4	2.72848	5.00×10-5	4.10×10-4	1.77707	2.30×10-3	2.41×10-2	transcription factor, putative, expressed
Seita.9G558000	1.0444	3.05×10-3	2.10×10-2	1.32292	5.00×10-5	4.10×10-4	1.31899	3.10×10-3	3.00×10-2	heavy metal-associated domain containing protein, expressed
Seita.9G229700	4.20448	4.00×10-4	4.20×10-3	3.96786	4.50×10-4	2.82×10-3	3.69674	5.00×10-5	1.07×10-3	beta-amylase, putative, expressed
Seita.5G072900	2.28481	4.50×10-4	4.65×10-3	2.48013	5.00×10-5	4.10×10-4	1.98975	2.65×10-3	2.68×10-2	helix-loop-helix DNA-binding domain containing protein, expressed
Seita.9G318200	2.44996	5.00×10-5	7.18×10-4	1.63457	5.00×10-5	4.10×10-4	2.0098	5.00×10-5	1.07×10-3	CAMK_CAMK_like.41 - CAMK includes calcium/calmodulin depedent protein kinases, expressed
Seita.2G141500	5.18642	5.00×10-5	7.18×10-4	2.99575	5.00×10-5	4.10×10-4	2.3944	5.00×10-5	1.07×10-3	expressed protein
Seita.1G308900	1.52913	1.00×10-4	1.32×10-3	2.85322	5.00×10-5	4.10×10-4	1.52215	5.00×10-5	1.07×10-3	3-ketoacyl-CoA synthase, putative, expressed
Seita.8G180800	1.43999	5.00×10-5	7.18×10-4	1.43055	5.00×10-5	4.10×10-4	1.31677	3.50×10-4	5.43×10-3	F-box/Kelch-repeat protein, putative, expressed
Seita.7G178000	1.89511	5.00×10-5	7.18×10-4	1.63134	5.00×10-5	4.10×10-4	1.22926	1.00×10-4	1.92×10-3	thioredoxin, putative, expressed
Seita.9G108100	2.8133	5.00×10-5	7.18×10-4	1.96013	5.00×10-5	4.10×10-4	1.59531	5.00×10-5	1.07×10-3	peptidase, M50 family, putative, expressed
Seita.9G443500	2.47305	5.00×10-5	7.18×10-4	1.50977	5.00×10-5	4.10×10-4	1.07338	8.50×10-4	1.10×10-2	OsRCI2-5 - Putative low temperature and salt responsive protein, expressed
Seita.3G239400	1.03289	9.00×10-4	8.11×10-3	1.14913	5.00×10-5	4.10×10-4	1.54319	5.00×10-5	1.07×10-3	MLO domain containing protein, putative, expressed
Seita.9G532700	1.79193	5.00×10-5	7.18×10-4	1.5878	5.00×10-5	4.10×10-4	1.62518	5.00×10-5	1.07×10-3	sulfate transporter, putative, expressed
Seita.3G357700	4.11187	5.00×10-5	7.18×10-4	2.07298	5.00×10-5	4.10×10-4	1.87675	5.00×10-5	1.07×10-3	ureide permease, putative, expressed
Seita.4G271300	1.25281	5.00×10-5	7.18×10-4	2.01664	5.00×10-5	4.10×10-4	1.99087	5.00×10-5	1.07×10-3	Complex I intermediate-associated protein 30 domain containing protein, putative, expressed
Seita.1G241800	2.03151	5.00×10-5	7.18×10-4	1.02465	5.00×10-5	4.10×10-4	1.70988	2.50×10-4	4.08×10-3	DUF584 domain containing protein, putative, expressed
Seita.4G141400	1.57775	5.00×10-5	7.18×10-4	1.25225	5.00×10-5	4.10×10-4	1.04952	7.00×10-4	9.37×10-3	pyrophosphate--fructose 6-phosphate 1-phosphotransferase subunit alpha, putative, expressed
Seita.9G453900	2.79731	5.00×10-5	7.18×10-4	1.26558	5.00×10-5	4.10×10-4	1.38623	2.00×10-4	3.42×10-3	laccase precursor protein, putative, expressed
Seita.5G250000	1.0167	6.70×10-3	3.83×10-2	1.37351	5.00×10-5	4.10×10-4	1.13446	3.20×10-3	3.07×10-2	viral A-type inclusion protein repeat containing protein, expressed
Seita.6G205300	1.19276	3.00×10-4	3.31×10-3	1.63455	5.00×10-5	4.10×10-4	2.89377	5.00×10-5	1.07×10-3	lipoxygenase, chloroplast precursor, putative, expressed
Seita.2G396300	1.2465	1.00×10-4	1.32×10-3	2.02066	5.00×10-5	4.10×10-4	2.19493	5.00×10-5	1.07×10-3	WD-40 repeat family protein, putative, expressed
Seita.2G193000	1.59531	5.00×10-5	7.18×10-4	1.00625	5.00×10-5	4.10×10-4	3.03154	5.00×10-5	1.07×10-3	armadillo/beta-catenin repeat family protein, putative, expressed
Seita.9G058700	3.73246	5.00×10-5	7.18×10-4	2.78945	3.10×10-3	1.43×10-2	4.12847	2.60×10-3	2.64×10-2	LTPL99 - Protease inhibitor/seed storage/LTP family protein precursor, expressed
Seita.9G334800	2.905	5.00×10-5	7.18×10-4	2.198	5.00×10-5	4.10×10-4	3.59651	5.00×10-5	1.07×10-3	expressed protein
Seita.6G128800	1.13332	2.50×10-4	2.86×10-3	1.60126	5.00×10-5	4.10×10-4	1.01388	1.55×10-3	1.77×10-2	phospholipid-transporting ATPase, putative, expressed
Seita.7G228200	2.83293	5.00×10-5	7.18×10-4	1.08271	5.00×10-5	4.10×10-4	1.40217	5.00×10-5	1.07×10-3	calcium-transporting ATPase, plasma membrane-type, putative, expressed
Seita.7G044900	1.34949	3.85×10-3	2.50×10-2	2.57779	5.00×10-5	4.10×10-4	2.4306	5.00×10-5	1.07×10-3	basic helix-loop-helix family protein, putative, expressed
Seita.8G237500	1.5605	5.00×10-5	7.18×10-4	1.85188	5.00×10-5	4.10×10-4	2.06711	5.00×10-5	1.07×10-3	Os11bglu36 SFR2 homologue, expressed
Seita.2G029300	3.53491	5.00×10-5	7.18×10-4	2.90289	5.00×10-5	4.10×10-4	2.82509	7.50×10-4	9.92×10-3	retrotransposon protein, putative, unclassified, expressed
Seita.4G021700	1.26385	3.00×10-4	3.31×10-3	2.13757	5.00×10-5	4.10×10-4	1.48099	1.50×10-4	2.70×10-3	no apical meristem protein, putative, expressed
Seita.1G264900	1.52765	1.00×10-4	1.32×10-3	1.20927	5.00×10-5	4.10×10-4	1.29062	1.50×10-4	2.70×10-3	aquaporin protein, putative, expressed
Seita.3G139000	2.11029	5.00×10-5	7.18×10-4	2.40125	5.00×10-5	4.10×10-4	1.54041	1.50×10-4	2.70×10-3	protein phosphatase 2C, putative, expressed
Seita.5G309000	2.14351	5.00×10-5	7.18×10-4	1.19465	5.00×10-5	4.10×10-4	1.35089	1.00×10-4	1.92×10-3	anthocyanidin 5,3-O-glucosyltransferase, putative, expressed
Seita.9G239700	3.17838	5.00×10-5	7.18×10-4	1.40324	5.00×10-5	4.10×10-4	3.46646	5.00×10-5	1.07×10-3	UDP-glucoronosyl and UDP-glucosyl transferase domain containing protein, expressed
Seita.5G381800	2.05875	1.50×10-4	1.87×10-3	1.64628	5.00×10-5	4.10×10-4	2.20573	5.00×10-5	1.07×10-3	LTPL101 - Protease inhibitor/seed storage/LTP family protein precursor, expressed
Seita.2G081000	2.58419	5.00×10-5	7.18×10-4	1.89603	5.00×10-5	4.10×10-4	1.92921	5.00×10-5	1.07×10-3	uncharacterized glycosyltransferase, putative, expressed
Seita.8G129600	1.76705	5.00×10-5	7.18×10-4	1.06185	5.00×10-5	4.10×10-4	1.67569	1.50×10-4	2.70×10-3	expressed protein
Seita.2G259000	3.51099	5.00×10-5	7.18×10-4	1.5109	6.20×10-3	2.51×10-2	1.50703	5.35×10-3	4.52×10-2	expressed protein
Seita.9G469300	2.37645	6.95×10-3	3.95×10-2	1.79945	7.00×10-4	4.10×10-3	1.85618	1.15×10-3	1.39×10-2	cytochrome P450, putative, expressed
Seita.3G186600	1.82797	1.50×10-4	1.87×10-3	1.57565	5.00×10-5	4.10×10-4	2.14374	5.00×10-5	1.07×10-3	tetratricopeptide repeat domain containing protein, expressed
Seita.9G457400	1.12783	5.00×10-5	7.18×10-4	1.67633	5.00×10-5	4.10×10-4	2.34115	5.00×10-5	1.07×10-3	RNA recognition motif containing protein, expressed
Seita.5G239000	3.20391	5.00×10-5	7.18×10-4	2.82606	5.00×10-5	4.10×10-4	3.29336	5.00×10-4	7.22×10-3	hydrolase, alpha/beta fold family domain containing protein, expressed
Seita.4G086600	1.74762	5.00×10-5	7.18×10-4	1.3964	5.00×10-5	4.10×10-4	1.16942	6.00×10-4	8.32×10-3	CDP-alcohol phosphatidyltransferase, putative, expressed
Seita.8G216200	3.45891	5.00×10-5	7.18×10-4	2.46206	5.00×10-5	4.10×10-4	2.9399	5.00×10-5	1.07×10-3	tropinone reductase 2, putative, expressed
Seita.7G108900	1.69717	5.00×10-5	7.18×10-4	1.43192	5.00×10-5	4.10×10-4	1.19933	5.00×10-5	1.07×10-3	expressed protein
Seita.4G137800	1.65736	5.00×10-5	7.18×10-4	1.03241	5.00×10-5	4.10×10-4	1.12562	2.50×10-4	4.08×10-3	glycine rich protein family protein, putative, expressed
Seita.4G112000	1.393	1.00×10-4	1.32×10-3	1.37094	5.00×10-5	4.10×10-4	1.64259	5.00×10-5	1.07×10-3	caleosin related protein, putative, expressed
Seita.1G015800	2.81569	5.00×10-5	7.18×10-4	3.1813	5.00×10-5	4.10×10-4	2.75772	5.75×10-3	4.80×10-2	late embryogenesis abundant domain-containing protein, putative, expressed
Seita.8G124200	5.67321	5.00×10-5	7.18×10-4	2.62481	5.00×10-5	4.10×10-4	2.07464	5.00×10-5	1.07×10-3	ribosomal protein, putative, expressed
Seita.5G441900	2.20711	7.50×10-4	6.99×10-3	2.53015	5.00×10-5	4.10×10-4	2.82915	5.00×10-5	1.07×10-3	flowering promoting factor-like 1, putative, expressed
Seita.5G346500	3.90953	5.00×10-5	7.18×10-4	1.10753	3.50×10-4	2.27×10-3	2.13737	5.00×10-5	1.07×10-3	protein disulfide isomerase, putative, expressed
Seita.3G400000	1.30165	2.00×10-4	2.37×10-3	2.73744	5.00×10-5	4.10×10-4	2.15232	2.50×10-4	4.08×10-3	thaumatin, putative, expressed
Seita.5G461700	3.27934	5.00×10-5	7.18×10-4	2.21929	5.00×10-5	4.10×10-4	1.88151	5.00×10-5	1.07×10-3	expressed protein
Seita.2G382600	4.01194	5.00×10-5	7.18×10-4	4.05119	5.00×10-5	4.10×10-4	1.60476	7.50×10-4	9.92×10-3	COBRA-like protein precursor, putative, expressed
Seita.7G144600	2.64461	5.00×10-5	7.18×10-4	1.39603	5.00×10-5	4.10×10-4	2.02222	1.50×10-4	2.70×10-3	malate synthase, glyoxysomal, putative, expressed
Seita.9G039100	1.33816	5.00×10-5	7.18×10-4	1.24148	5.00×10-5	4.10×10-4	1.6811	5.00×10-5	1.07×10-3	methylenetetrahydrofolate reductase, putative, expressed
Seita.9G120700	2.35049	5.00×10-5	7.18×10-4	2.34754	5.00×10-5	4.10×10-4	2.14932	5.00×10-5	1.07×10-3	plastocyanin-like domain containing protein, putative, expressed
Seita.1G093200	1.77168	5.00×10-5	7.18×10-4	1.81667	5.00×10-5	4.10×10-4	1.84814	5.00×10-5	1.07×10-3	UOS1, putative, expressed
Seita.2G304200	1.46192	5.00×10-5	7.18×10-4	1.14259	5.00×10-5	4.10×10-4	1.05164	5.05×10-3	4.33×10-2	sialin, putative, expressed
Seita.9G410000	1.14117	4.00×10-4	4.20×10-3	1.36521	5.00×10-5	4.10×10-4	1.50472	5.00×10-5	1.07×10-3	nodulin MtN3 family protein, putative, expressed
Seita.1G239000	1.52119	5.00×10-5	7.18×10-4	1.15629	5.00×10-5	4.10×10-4	1.07332	4.50×10-3	3.97×10-2	RNA recognition motif containing protein, putative, expressed
Seita.5G365900	3.64666	5.00×10-5	7.18×10-4	2.7956	5.00×10-5	4.10×10-4	2.65853	5.00×10-5	1.07×10-3	laccase precursor protein, putative, expressed
Seita.3G120200	2.65775	5.00×10-5	7.18×10-4	1.37844	5.00×10-5	4.10×10-4	1.20949	1.50×10-4	2.70×10-3	early-responsive to dehydration protein-related, putative, expressed
Seita.9G130100	4.19196	5.00×10-5	7.18×10-4	2.02336	1.00×10-3	5.56×10-3	3.42194	5.00×10-4	7.22×10-3	LTPL78 - Protease inhibitor/seed storage/LTP family protein precursor, expressed
Seita.5G376100	3.84274	5.00×10-5	7.18×10-4	2.18919	5.00×10-5	4.10×10-4	2.2393	1.00×10-4	1.92×10-3	DnaK family protein, putative, expressed
Seita.5G378200	5.14812	5.00×10-5	7.18×10-4	5.32063	5.00×10-4	3.09×10-3	3.82462	5.00×10-5	1.07×10-3	laccase precursor protein, putative, expressed
Seita.5G379400	2.09901	5.00×10-5	7.18×10-4	2.29904	5.00×10-5	4.10×10-4	1.70085	5.00×10-5	1.07×10-3	protein phosphatase 2C, putative, expressed
Seita.6G163200	1.38404	5.00×10-5	7.18×10-4	1.22417	5.00×10-5	4.10×10-4	2.66603	5.00×10-5	1.07×10-3	CAMK_KIN1/SNF1/Nim1_like.33 - CAMK includes calcium/calmodulin depedent protein kinases, expressed
Seita.8G008100	4.13253	5.00×10-5	7.18×10-4	2.5682	5.00×10-5	4.10×10-4	1.99343	5.00×10-5	1.07×10-3	NAC domain transcription factor, putative, expressed
Seita.4G111900	1.31655	6.00×10-4	5.83×10-3	1.22804	5.00×10-5	4.10×10-4	1.54338	8.50×10-4	1.10×10-2	caleosin related protein, putative, expressed
Seita.8G015200	2.05836	5.00×10-5	7.18×10-4	1.52598	5.00×10-5	4.10×10-4	1.8968	2.00×10-4	3.42×10-3	peroxidase precursor, putative, expressed
Seita.3G308800	1.21501	1.00×10-4	1.32×10-3	1.01117	5.00×10-5	4.10×10-4	1.25467	1.00×10-4	1.92×10-3	pentatricopeptide, putative, expressed
Seita.3G035500	1.8813	1.50×10-4	1.87×10-3	1.6036	5.00×10-5	4.10×10-4	1.82144	5.00×10-5	1.07×10-3	5-methyltetrahydropteroyltriglutamate--homocysteine methyltransferase, putative, expressed
Seita.4G227100	1.60872	5.00×10-5	7.18×10-4	2.66038	5.00×10-5	4.10×10-4	3.32762	5.00×10-5	1.07×10-3	UDP-glucoronosyl and UDP-glucosyl transferase domain containing protein, expressed
Seita.5G127600	1.64685	5.00×10-5	7.18×10-4	1.16386	5.00×10-5	4.10×10-4	1.2121	5.00×10-5	1.07×10-3	TMS membrane protein/tumour differentially expressed protein, putative, expressed
Seita.5G145900	2.85128	1.00×10-4	1.32×10-3	2.6484	5.00×10-5	4.10×10-4	2.77921	5.00×10-5	1.07×10-3	CAMK_KIN1/SNF1/Nim1_like.8 - CAMK includes calcium/calmodulin depedent protein kinases, expressed
Seita.2G240500	2.84708	5.00×10-5	7.18×10-4	1.31982	1.30×10-3	6.91×10-3	2.37357	8.50×10-4	1.10×10-2	white-brown complex homolog protein 11, putative, expressed
Seita.8G020600	2.83132	5.00×10-5	7.18×10-4	1.44288	5.00×10-5	4.10×10-4	1.20056	5.00×10-5	1.07×10-3	major facilitator superfamily antiporter, putative, expressed
Seita.3G171600	1.56641	5.00×10-5	7.18×10-4	1.49714	5.00×10-5	4.10×10-4	1.19801	1.05×10-3	1.29×10-2	reticulon domain containing protein, putative, expressed
Seita.7G294000	1.30769	8.00×10-4	7.36×10-3	1.43677	5.00×10-5	4.10×10-4	1.68598	5.00×10-5	1.07×10-3	actin, putative, expressed
Seita.2G200200	1.88854	5.00×10-5	7.18×10-4	1.48181	5.00×10-5	4.10×10-4	2.71334	1.00×10-3	1.25×10-2	MYB family transcription factor, putative, expressed
Seita.1G256200	1.37568	5.60×10-3	3.33×10-2	1.58013	1.00×10-4	7.66×10-4	2.89785	5.00×10-5	1.07×10-3	-
Seita.2G285600	2.31684	5.00×10-5	7.18×10-4	1.55615	5.00×10-5	4.10×10-4	1.86129	5.00×10-5	1.07×10-3	senescence-inducible chloroplast stay-green protein 1, putative, expressed
Seita.6G026000	2.02778	5.00×10-5	7.18×10-4	1.90009	5.00×10-5	4.10×10-4	2.10514	5.00×10-5	1.07×10-3	dehydrogenase, putative, expressed
Seita.2G133000	1.10823	5.20×10-3	3.15×10-2	1.44204	5.00×10-5	4.10×10-4	1.88799	5.00×10-5	1.07×10-3	GDSL-like lipase/acylhydrolase, putative, expressed
Seita.9G249300	4.2765	5.00×10-5	7.18×10-4	2.65562	5.00×10-5	4.10×10-4	4.3296	5.00×10-5	1.07×10-3	transferase family protein, putative, expressed
Seita.5G109600	2.14767	1.80×10-3	1.41×10-2	3.77439	1.50×10-4	1.10×10-3	3.29339	5.00×10-5	1.07×10-3	gibberellin receptor GID1L2, putative, expressed
Seita.5G439600	1.72339	5.00×10-5	7.18×10-4	1.36498	5.00×10-5	4.10×10-4	2.08669	1.00×10-4	1.92×10-3	expressed protein
Seita.9G058800	3.84583	5.00×10-5	7.18×10-4	1.91942	5.00×10-5	4.10×10-4	2.01968	1.00×10-4	1.92×10-3	LTPL73 - Protease inhibitor/seed storage/LTP family protein precursor, expressed
Seita.6G208200	2.55183	5.00×10-5	7.18×10-4	1.15651	5.00×10-5	4.10×10-4	2.43563	5.00×10-5	1.07×10-3	3-hydroxy-3-methylglutaryl-coenzyme A reductase, putative, expressed
Seita.2G428900	2.11442	5.00×10-5	7.18×10-4	1.03155	5.00×10-5	4.10×10-4	1.04812	9.50×10-4	1.20×10-2	universal stress protein domain containing protein, putative, expressed
Seita.6G093400	1.87935	1.00×10-4	1.32×10-3	1.15504	1.05×10-2	3.85×10-2	1.72586	3.10×10-3	3.00×10-2	AMP-binding domain containing protein, expressed
Seita.3G323200	1.19475	9.00×10-4	8.11×10-3	1.22506	5.00×10-5	4.10×10-4	1.42805	1.50×10-4	2.70×10-3	expressed protein
Seita.9G559200	2.38763	5.00×10-5	7.18×10-4	1.57858	5.00×10-5	4.10×10-4	1.75569	5.00×10-5	1.07×10-3	fatty acid hydroxylase, putative, expressed
Seita.6G005300	4.84063	5.00×10-5	7.18×10-4	4.76727	5.00×10-5	4.10×10-4	4.0968	5.00×10-5	1.07×10-3	protein phosphatase 2C, putative, expressed
Seita.3G291600	3.2452	5.00×10-5	7.18×10-4	2.85959	1.00×10-4	7.66×10-4	2.22727	2.40×10-3	2.49×10-2	glycerol-3-phosphate acyltransferase, putative, expressed
Seita.2G177500	2.66538	5.00×10-5	7.18×10-4	1.77042	5.00×10-5	4.10×10-4	2.66519	5.00×10-5	1.07×10-3	protein phosphatase 2C, putative, expressed
Seita.7G098500	3.50989	5.00×10-5	7.18×10-4	1.25993	5.00×10-5	4.10×10-4	1.25969	1.25×10-3	1.49×10-2	CSLH1 - cellulose synthase-like family H, expressed
Seita.7G019500	1.42146	7.85×10-3	4.33×10-2	1.14435	2.85×10-3	1.33×10-2	1.42379	3.95×10-3	3.58×10-2	thaumatin, putative, expressed
Seita.1G340600	1.5752	9.25×10-3	4.92×10-2	1.83791	5.00×10-5	4.10×10-4	2.00493	2.50×10-4	4.08×10-3	expressed protein
Seita.2G206200	2.28791	5.00×10-5	7.18×10-4	1.69495	5.00×10-5	4.10×10-4	1.17665	8.50×10-4	1.10×10-2	CAMK_KIN1/SNF1/Nim1_like.34 - CAMK includes calcium/calmodulin depedent protein kinases, expressed
Seita.1G253700	4.01129	5.00×10-5	7.18×10-4	3.59285	5.00×10-5	4.10×10-4	3.69624	5.00×10-5	1.07×10-3	homeobox associated leucine zipper, putative, expressed
Seita.3G159500	1.84735	2.30×10-3	1.71×10-2	1.87948	5.00×10-5	4.10×10-4	1.74203	1.00×10-3	1.25×10-2	CPuORF26 - conserved peptide uORF-containing transcript, expressed
Seita.9G447400	3.01792	5.00×10-5	7.18×10-4	2.84221	5.00×10-5	4.10×10-4	2.21278	8.00×10-4	1.04×10-2	white-brown complex homolog protein, putative, expressed
Seita.9G161200	2.02197	5.00×10-5	7.18×10-4	2.05052	5.00×10-5	4.10×10-4	2.16434	5.00×10-5	1.07×10-3	transporter family protein, putative, expressed
Seita.1G025800	3.88707	5.00×10-5	7.18×10-4	4.6877	5.00×10-5	4.10×10-4	1.49146	3.85×10-3	3.51×10-2	HSF-type DNA-binding domain containing protein, expressed
Seita.3G182400	1.23589	1.00×10-4	1.32×10-3	1.72368	5.00×10-5	4.10×10-4	1.90442	5.00×10-5	1.07×10-3	expressed protein
Seita.4G177400	1.9484	5.00×10-5	7.18×10-4	1.25172	5.00×10-5	4.10×10-4	2.15205	5.00×10-5	1.07×10-3	aminotransferase, classes I and II, domain containing protein, expressed
Seita.3G164700	1.60496	5.00×10-5	7.18×10-4	2.13257	5.00×10-5	4.10×10-4	1.94469	5.00×10-5	1.07×10-3	protein phosphatase 2C, putative, expressed
Seita.9G435200	4.26586	5.00×10-5	7.18×10-4	3.64547	5.00×10-5	4.10×10-4	2.95913	5.00×10-5	1.07×10-3	pathogenesis-related Bet v I family protein, putative, expressed
Seita.5G275200	3.29551	5.00×10-5	7.18×10-4	2.31481	5.00×10-5	4.10×10-4	2.45428	5.00×10-5	1.07×10-3	protein binding protein, putative, expressed
Seita.1G373600	3.53494	5.00×10-5	7.18×10-4	2.09213	5.00×10-5	4.10×10-4	1.93587	5.00×10-5	1.07×10-3	remorin C-terminal domain containing protein, putative, expressed
Seita.9G435800	1.66024	1.50×10-4	1.87×10-3	1.00125	1.31×10-2	4.55×10-2	1.73161	3.20×10-3	3.07×10-2	SAG20, putative, expressed
Seita.9G034000	4.34461	5.00×10-5	7.18×10-4	1.9341	5.00×10-5	4.10×10-4	1.30825	1.00×10-4	1.92×10-3	actin-depolymerizing factor, putative, expressed
Seita.9G460200	2.62468	5.00×10-5	7.18×10-4	1.78115	5.00×10-5	4.10×10-4	2.72137	5.00×10-5	1.07×10-3	protein phosphatase 2C, putative, expressed
Seita.3G243700	3.90333	5.00×10-5	7.18×10-4	3.05289	2.90×10-3	1.35×10-2	1.92177	3.35×10-3	3.18×10-2	peptide transporter PTR2, putative, expressed
Seita.3G209800	5.66896	5.00×10-5	7.18×10-4	2.39878	5.00×10-5	4.10×10-4	2.09453	5.00×10-5	1.07×10-3	phosphatidylethanolamine-binding protein, putative, expressed
Seita.5G456100	1.29483	5.00×10-5	7.18×10-4	1.34763	5.00×10-5	4.10×10-4	2.50999	5.00×10-5	1.07×10-3	NADPH quinone oxidoreductase, putative, expressed
Seita.7G124900	3.25797	5.00×10-5	7.18×10-4	1.16746	5.00×10-5	4.10×10-4	1.9037	2.00×10-4	3.42×10-3	no apical meristem protein, putative, expressed
Seita.5G241000	1.34236	5.00×10-5	7.18×10-4	1.45744	5.00×10-5	4.10×10-4	1.72081	5.00×10-5	1.07×10-3	ATPCME, putative, expressed
Seita.1G250200	3.28863	4.00×10-4	4.20×10-3	1.12843	3.35×10-3	1.52×10-2	1.97796	3.00×10-3	2.93×10-2	oxidoreductase, short chain dehydrogenase/reductase family domain containing protein, expressed
Seita.8G132600	2.87872	5.00×10-5	7.18×10-4	1.62561	5.00×10-5	4.10×10-4	1.80327	5.00×10-5	1.07×10-3	cytochrome P450, putative, expressed
Seita.1G273900	1.48719	8.50×10-4	7.74×10-3	1.0802	3.00×10-4	2.00×10-3	1.45627	2.55×10-3	2.60×10-2	B3 DNA binding domain containing protein, expressed
Seita.9G519400	1.70035	2.00×10-4	2.37×10-3	2.00656	5.00×10-5	4.10×10-4	1.49371	2.50×10-4	4.08×10-3	hydrolase protein, putative, expressed
Seita.6G137600	1.5255	5.00×10-5	7.18×10-4	1.84269	5.00×10-5	4.10×10-4	1.85186	5.00×10-5	1.07×10-3	cleavage and polyadenylation specificity factor subunit 5, putative, expressed
Seita.1G127900	1.68048	5.00×10-5	7.18×10-4	1.24042	5.00×10-5	4.10×10-4	1.22383	5.00×10-5	1.07×10-3	sialin, putative, expressed
Seita.9G023200	2.26985	5.00×10-5	7.18×10-4	3.11247	5.00×10-5	4.10×10-4	2.10633	5.00×10-5	1.07×10-3	glycerol-3-phosphate acyltransferase, putative, expressed
Seita.2G351400	3.34788	5.00×10-5	7.18×10-4	1.63595	5.15×10-3	2.17×10-2	2.58448	3.75×10-3	3.44×10-2	MYB family transcription factor, putative, expressed
Seita.8G204900	3.38609	5.00×10-5	7.18×10-4	1.50282	5.00×10-5	4.10×10-4	2.09807	5.00×10-5	1.07×10-3	ATPase 3, putative, expressed
Seita.8G030100	1.26664	5.00×10-5	7.18×10-4	1.0075	5.00×10-5	4.10×10-4	1.39754	2.20×10-3	2.32×10-2	phytosulfokines precursor, putative, expressed
Seita.1G135500	1.6921	5.00×10-5	7.18×10-4	1.28707	2.00×10-4	1.40×10-3	2.38778	3.00×10-3	2.93×10-2	nodulin MtN3 family protein, putative, expressed
Seita.1G342400	1.09463	6.55×10-3	3.76×10-2	1.3745	1.00×10-4	7.66×10-4	1.52469	4.50×10-4	6.62×10-3	hsp20/alpha crystallin family protein, putative, expressed
Seita.2G324100	1.40296	5.00×10-5	7.18×10-4	1.16073	5.00×10-5	4.10×10-4	1.93922	5.00×10-5	1.07×10-3	MATE efflux family protein, putative, expressed
Seita.2G399100	4.67066	5.00×10-5	7.18×10-4	3.30788	4.50×10-4	2.82×10-3	4.39601	2.50×10-4	4.08×10-3	retrotransposon protein, putative, unclassified, expressed
Seita.9G399900	1.73993	5.00×10-5	7.18×10-4	1.61159	5.00×10-5	4.10×10-4	2.63237	5.00×10-5	1.07×10-3	rhythmically expressed gene 2 protein, putative, expressed
Seita.2G142500	1.76114	5.00×10-5	7.18×10-4	1.05437	1.00×10-4	7.66×10-4	2.04721	5.00×10-5	1.07×10-3	cyclase family protein, putative, expressed
Seita.7G198100	4.53255	5.00×10-5	7.18×10-4	2.38816	5.00×10-5	4.10×10-4	3.18394	5.50×10-4	7.80×10-3	OsPOP9 - Putative Prolyl Oligopeptidase homologue, expressed
Seita.5G180600	1.18383	5.00×10-5	7.18×10-4	1.01498	5.00×10-5	4.10×10-4	1.4502	5.00×10-5	1.07×10-3	universal stress protein domain containing protein, putative, expressed
Seita.5G381100	4.54266	5.00×10-5	7.18×10-4	2.14025	5.00×10-5	4.10×10-4	2.63852	5.00×10-5	1.07×10-3	amino acid kinase, putative, expressed
Seita.9G359000	2.96772	2.35×10-3	1.74×10-2	3.22435	1.60×10-3	8.21×10-3	4.35606	5.50×10-4	7.80×10-3	expressed protein
Seita.6G028000	3.74358	5.00×10-5	7.18×10-4	1.81101	5.00×10-5	4.10×10-4	2.83805	5.00×10-5	1.07×10-3	expressed protein
Seita.5G361200	3.41923	5.00×10-5	7.18×10-4	3.30315	5.00×10-5	4.10×10-4	3.53971	5.00×10-5	1.07×10-3	cytochrome P450, putative, expressed
Seita.5G171100	1.83362	2.15×10-3	1.62×10-2	2.67129	2.00×10-4	1.40×10-3	1.99064	1.75×10-3	1.94×10-2	glutathione S-transferase, putative, expressed
Seita.2G153000	1.79124	1.00×10-4	1.32×10-3	1.74555	5.00×10-5	4.10×10-4	2.42662	4.00×10-4	6.02×10-3	permease domain containing protein, putative, expressed
Seita.9G114100	1.1393	5.00×10-5	7.18×10-4	1.37547	5.00×10-5	4.10×10-4	1.76153	5.00×10-5	1.07×10-3	hydrolase, alpha/beta fold family domain containing protein, expressed
Seita.3G337400	1.39497	1.00×10-4	1.32×10-3	1.06683	5.00×10-5	4.10×10-4	3.96756	5.00×10-5	1.07×10-3	calmodulin binding protein, putative, expressed
Seita.7G097100	1.76566	1.80×10-3	1.41×10-2	1.08426	5.00×10-5	4.10×10-4	1.37374	2.00×10-4	3.42×10-3	abscisic stress-ripening, putative, expressed
Seita.1G348100	1.71275	5.00×10-5	7.18×10-4	1.16714	5.00×10-5	4.10×10-4	1.08813	4.00×10-4	6.02×10-3	pheophorbide a oxygenase, chloroplast precursor, putative, expressed
Seita.2G049800	4.29462	5.00×10-5	7.18×10-4	2.99888	5.00×10-5	4.10×10-4	2.24403	1.70×10-3	1.90×10-2	LTPL99 - Protease inhibitor/seed storage/LTP family protein precursor, expressed
Seita.9G100900	1.66138	5.00×10-5	7.18×10-4	1.81314	5.00×10-5	4.10×10-4	1.36193	5.00×10-5	1.07×10-3	expressed protein
Seita.8G237700	2.76089	5.00×10-5	7.18×10-4	1.26814	5.00×10-5	4.10×10-4	1.30633	1.00×10-4	1.92×10-3	MYB family transcription factor, putative, expressed
Seita.4G193700	2.89994	5.00×10-5	7.18×10-4	1.31645	5.00×10-5	4.10×10-4	1.56419	1.00×10-4	1.92×10-3	WAX2, putative, expressed
Seita.6G163400	1.30167	5.00×10-5	7.18×10-4	1.98072	5.00×10-5	4.10×10-4	1.2246	2.00×10-4	3.42×10-3	cinnamoyl-CoA reductase, putative, expressed
Seita.4G180500	2.20672	5.00×10-5	7.18×10-4	1.72739	5.00×10-5	4.10×10-4	1.99335	6.50×10-4	8.81×10-3	HSF-type DNA-binding domain containing protein, expressed
Seita.3G352300	2.65876	5.00×10-5	7.18×10-4	1.82756	5.00×10-5	4.10×10-4	1.36773	5.00×10-5	1.07×10-3	transporter family protein, putative, expressed
Seita.3G102200	1.04354	3.00×10-4	3.31×10-3	1.08822	5.00×10-5	4.10×10-4	2.3341	5.00×10-5	1.07×10-3	embryo-specific 3, putative, expressed
Seita.8G058100	2.61044	1.05×10-3	9.16×10-3	1.45006	9.00×10-4	5.08×10-3	1.96035	1.65×10-3	1.86×10-2	expressed protein
Seita.5G096100	1.14873	2.75×10-3	1.94×10-2	1.75739	5.00×10-5	4.10×10-4	1.41961	2.50×10-4	4.08×10-3	lipid phosphatase protein, putative, expressed
Seita.2G226300	1.09148	9.50×10-4	8.45×10-3	1.56964	5.00×10-5	4.10×10-4	1.72035	5.00×10-5	1.07×10-3	aspartic proteinase nepenthesin-1 precursor, putative, expressed
Seita.4G088600	3.55828	5.00×10-5	7.18×10-4	3.36316	1.60×10-3	8.21×10-3	2.61988	5.00×10-5	1.07×10-3	plastocyanin-like domain containing protein, putative, expressed
Seita.1G210300	1.16367	1.00×10-4	1.32×10-3	1.11599	5.00×10-5	4.10×10-4	1.64893	5.00×10-5	1.07×10-3	mitochondrial prohibitin complex protein 1, putative, expressed
Seita.5G021400	1.3695	1.00×10-4	1.32×10-3	1.97633	5.00×10-5	4.10×10-4	1.96937	5.00×10-5	1.07×10-3	late embryogenesis abundant protein, putative, expressed
Seita.7G184600	2.73705	5.00×10-5	7.18×10-4	2.09975	5.00×10-5	4.10×10-4	3.1611	5.00×10-5	1.07×10-3	homeobox associated leucine zipper, putative, expressed
Seita.2G379400	3.48127	5.00×10-5	7.18×10-4	2.50491	5.00×10-5	4.10×10-4	3.19198	3.00×10-4	4.76×10-3	retrotransposon protein, putative, unclassified, expressed
Seita.6G145300	1.26974	2.45×10-3	1.79×10-2	1.20041	1.00×10-4	7.66×10-4	1.28992	3.35×10-3	3.18×10-2	expressed protein
Seita.9G435000	5.90622	5.00×10-5	7.18×10-4	3.9213	5.00×10-5	4.10×10-4	3.67453	5.00×10-5	1.07×10-3	pathogenesis-related Bet v I family protein, putative, expressed
Seita.1G123000	1.35138	5.00×10-5	7.18×10-4	1.9121	5.00×10-5	4.10×10-4	1.25194	5.00×10-5	1.07×10-3	transporter family protein, putative, expressed
Seita.7G093500	5.15697	5.00×10-5	7.18×10-4	2.92944	5.00×10-5	4.10×10-4	4.45045	5.00×10-5	1.07×10-3	LTPL102 - Protease inhibitor/seed storage/LTP family protein precursor, expressed
Seita.7G221800	1.47626	5.00×10-5	7.18×10-4	1.43733	5.00×10-5	4.10×10-4	1.10423	1.30×10-3	1.54×10-2	peptide transporter PTR2, putative, expressed
Seita.5G182500	1.4116	1.00×10-3	8.81×10-3	2.87332	5.00×10-5	4.10×10-4	1.98513	5.00×10-5	1.07×10-3	fatty acid hydroxylase, putative, expressed
Seita.5G235300	1.70876	5.00×10-5	7.18×10-4	1.58204	5.00×10-5	4.10×10-4	2.4391	5.00×10-5	1.07×10-3	cytochrome P450 72A1, putative, expressed
Seita.3G373500	1.30871	2.60×10-3	1.87×10-2	1.01585	2.85×10-3	1.33×10-2	1.48155	5.35×10-3	4.52×10-2	WD-40 repeat family protein, putative, expressed
Seita.5G042700	3.37979	9.30×10-3	4.94×10-2	4.43824	2.60×10-3	1.23×10-2	inf	5.00×10-5	1.07×10-3	expressed protein
Seita.6G092300	3.70792	5.00×10-5	7.18×10-4	2.48692	3.35×10-3	1.52×10-2	2.47197	1.70×10-3	1.90×10-2	-
Seita.9G303200	2.21408	5.00×10-5	7.18×10-4	1.55764	5.00×10-5	4.10×10-4	1.2433	3.35×10-3	3.18×10-2	OsSCP46 - Putative Serine Carboxypeptidase homologue, expressed
Seita.6G148100	2.37967	5.00×10-5	7.18×10-4	2.32875	5.00×10-5	4.10×10-4	2.06708	5.00×10-5	1.07×10-3	O-methyltransferase, putative, expressed
Seita.1G331600	1.06184	2.00×10-4	2.37×10-3	1.86643	5.00×10-5	4.10×10-4	1.94354	5.00×10-5	1.07×10-3	bZIP transcription factor, putative, expressed
Seita.5G271700	2.68029	5.00×10-5	7.18×10-4	1.19543	5.00×10-5	4.10×10-4	1.03374	5.30×10-3	4.49×10-2	wax synthase, putative, expressed
Seita.2G327500	1.43535	5.00×10-5	7.18×10-4	1.19978	5.00×10-5	4.10×10-4	1.43851	5.00×10-5	1.07×10-3	OsAPRL1 adenosine 5\'-phosphosulfate reductase-like OsAPRL1, expressed
Seita.2G088600	3.61681	5.50×10-4	5.45×10-3	1.65329	1.01×10-2	3.73×10-2	1.73164	5.95×10-3	4.92×10-2	expressed protein
Seita.9G183400	1.19639	1.60×10-3	1.28×10-2	1.47073	5.00×10-5	4.10×10-4	1.17379	1.80×10-3	1.99×10-2	MATE efflux family protein, putative, expressed
Seita.5G112900	2.64677	5.00×10-5	7.18×10-4	1.72666	5.00×10-5	4.10×10-4	1.11037	1.10×10-3	1.34×10-2	-
Seita.3G072600	1.3667	5.00×10-5	7.18×10-4	1.33214	5.00×10-5	4.10×10-4	1.99087	5.00×10-5	1.07×10-3	lachrymatory factor synthase, putative, expressed
Seita.9G072600	1.0487	9.45×10-3	4.99×10-2	2.7156	5.00×10-5	4.10×10-4	2.86219	5.00×10-5	1.07×10-3	methyltransferase, putative, expressed
Seita.9G435100	5.3847	5.00×10-5	7.18×10-4	3.48773	5.00×10-5	4.10×10-4	2.86132	5.00×10-5	1.07×10-3	pathogenesis-related Bet v I family protein, putative, expressed
Seita.7G018000	2.0598	5.00×10-4	5.04×10-3	2.24223	3.00×10-3	1.39×10-2	1.85566	4.85×10-3	4.19×10-2	expressed protein
Seita.3G264300	2.56289	5.00×10-5	7.18×10-4	1.47039	5.00×10-5	4.10×10-4	1.67127	3.65×10-3	3.36×10-2	eukaryotic peptide chain release factor subunit 1-1, putative, expressed
Seita.5G468100	-1.7485	5.00×10-5	7.18×10-4	-2.63082	5.00×10-5	4.10×10-4	-1.3131	3.95×10-3	3.58×10-2	MYB family transcription factor, putative, expressed
Seita.5G269000	-1.2883	5.00×10-5	7.18×10-4	-1.48524	5.00×10-5	4.10×10-4	-1.60011	5.00×10-5	1.07×10-3	expressed protein
Seita.6G033500	-2.2849	5.00×10-5	7.18×10-4	-1.04683	5.00×10-5	4.10×10-4	-1.32133	5.00×10-5	1.07×10-3	protein kinase, putative, expressed
Seita.7G333200	-2.19715	5.00×10-5	7.18×10-4	-1.36366	5.00×10-5	4.10×10-4	-1.86537	5.00×10-5	1.07×10-3	expressed protein
Seita.2G158200	-2.18859	5.00×10-5	7.18×10-4	-1.73718	5.00×10-5	4.10×10-4	-1.66482	1.50×10-4	2.70×10-3	cyclin, putative, expressed
Seita.2G041500	-1.54494	5.00×10-5	7.18×10-4	-3.31422	5.00×10-5	4.10×10-4	-4.69644	5.00×10-5	1.07×10-3	gibberellin receptor GID1L2, putative, expressed
Seita.8G158600	-1.01302	3.50×10-4	3.77×10-3	-3.05622	5.00×10-5	4.10×10-4	-2.77488	5.00×10-5	1.07×10-3	expressed protein
Seita.5G403300	-3.83492	5.00×10-5	7.18×10-4	-1.82354	5.00×10-5	4.10×10-4	-1.82649	5.00×10-5	1.07×10-3	nodulin MtN3 family protein, putative, expressed
Seita.2G122700	-2.989	5.00×10-5	7.18×10-4	-1.66942	5.00×10-5	4.10×10-4	-2.69496	5.00×10-5	1.07×10-3	expansin precursor, putative, expressed
Seita.9G140100	-2.50538	5.00×10-5	7.18×10-4	-2.06285	5.00×10-5	4.10×10-4	-2.11552	5.00×10-5	1.07×10-3	thiamine biosynthesis protein thiC, putative, expressed
Seita.7G183800	-1.84214	5.00×10-5	7.18×10-4	-1.69575	5.00×10-5	4.10×10-4	-1.52915	5.00×10-5	1.07×10-3	B-box zinc finger family protein, putative, expressed
Seita.5G210300	-2.58351	5.00×10-5	7.18×10-4	-1.46234	2.00×10-4	1.40×10-3	-1.79016	1.60×10-3	1.82×10-2	aldehyde dehydrogenase, putative, expressed
Seita.7G050800	-1.94125	5.00×10-5	7.18×10-4	-3.75673	5.00×10-5	4.10×10-4	-1.67199	5.00×10-5	1.07×10-3	cytokinin-O-glucosyltransferase 2, putative, expressed
Seita.4G016300	-1.4367	2.25×10-3	1.68×10-2	-1.58016	1.65×10-3	8.43×10-3	-2.60478	1.15×10-3	1.39×10-2	peroxisomal membrane protein, putative, expressed
Seita.7G193900	-1.5858	5.00×10-5	7.18×10-4	-1.76265	5.00×10-5	4.10×10-4	-1.80113	5.00×10-5	1.07×10-3	copper-transporting ATPase 3, putative, expressed
Seita.2G342400	-2.68943	5.00×10-5	7.18×10-4	-1.12944	5.00×10-5	4.10×10-4	-2.93887	5.00×10-5	1.07×10-3	legume lectins beta domain containing protein, putative, expressed
Seita.6G060000	-1.29769	5.00×10-5	7.18×10-4	-1.09261	5.00×10-5	4.10×10-4	-1.37542	5.00×10-5	1.07×10-3	NAD dependent epimerase/dehydratase family protein, putative, expressed
Seita.9G575700	-1.8581	5.00×10-5	7.18×10-4	-1.89478	5.00×10-5	4.10×10-4	-3.05095	5.00×10-5	1.07×10-3	aminotransferase domain containing protein, putative, expressed
Seita.3G224500	-2.20685	5.00×10-5	7.18×10-4	-1.21869	5.00×10-5	4.10×10-4	-1.47707	5.00×10-5	1.07×10-3	solute carrier family 35 member F2, putative, expressed
Seita.9G150400	-1.27354	5.00×10-5	7.18×10-4	-1.07582	5.00×10-5	4.10×10-4	-1.679	5.00×10-5	1.07×10-3	antitermination NusB domain-containing protein, putative, expressed
Seita.2G401700	-1.05542	1.85×10-3	1.44×10-2	-1.80118	5.00×10-5	4.10×10-4	-1.92656	5.00×10-5	1.07×10-3	RNA recognition motif containing protein, putative, expressed
Seita.7G061400	-1.06264	6.50×10-4	6.22×10-3	-2.84404	5.00×10-5	4.10×10-4	-1.4341	1.05×10-3	1.29×10-2	OsWAK45 - OsWAK receptor-like protein kinase, expressed
Seita.1G253100	-1.69686	5.00×10-5	7.18×10-4	-1.3686	5.00×10-5	4.10×10-4	-1.78329	2.50×10-4	4.08×10-3	B-box zinc finger family protein, putative, expressed
Seita.5G384200	-1.18006	6.00×10-3	3.50×10-2	-1.52104	5.00×10-5	4.10×10-4	-2.03609	7.00×10-4	9.37×10-3	tyrosine protein kinase domain containing protein, putative, expressed
Seita.8G002600	-1.43535	5.00×10-5	7.18×10-4	-1.40601	5.00×10-5	4.10×10-4	-1.79125	5.00×10-5	1.07×10-3	expressed protein
Seita.7G299500	-1.38249	1.00×10-4	1.32×10-3	-1.06477	5.00×10-5	4.10×10-4	-1.17258	4.50×10-3	3.97×10-2	DUF584 domain containing protein, putative, expressed
Seita.3G318100	-3.71397	5.00×10-5	7.18×10-4	-1.76994	5.00×10-5	4.10×10-4	-1.29665	2.70×10-3	2.72×10-2	OsWAK104 - OsWAK receptor-like protein kinase, expressed
Seita.8G214300	-2.16973	5.00×10-5	7.18×10-4	-1.01432	5.00×10-5	4.10×10-4	-1.20793	1.30×10-3	1.54×10-2	expressed protein
Seita.3G204900	-3.72741	5.00×10-5	7.18×10-4	-1.90293	5.00×10-5	4.10×10-4	-3.28143	5.00×10-5	1.07×10-3	expansin precursor, putative, expressed
Seita.5G194800	-1.82379	5.00×10-5	7.18×10-4	-2.97416	5.00×10-5	4.10×10-4	-1.49146	2.45×10-3	2.52×10-2	receptor-like kinase, putative, expressed
Seita.5G174100	-2.15439	5.00×10-5	7.18×10-4	-1.45578	5.00×10-5	4.10×10-4	-1.61863	5.00×10-5	1.07×10-3	peroxidase precursor, putative, expressed
Seita.9G519500	-1.09836	1.50×10-4	1.87×10-3	-1.03371	5.00×10-5	4.10×10-4	-1.01238	2.20×10-3	2.32×10-2	hydrolase, alpha/beta fold family protein, putative, expressed
Seita.5G303900	-2.19094	5.00×10-5	7.18×10-4	-1.10511	5.00×10-5	4.10×10-4	-1.00845	2.15×10-3	2.29×10-2	OsSub3 - Putative Subtilisin homologue, expressed
Seita.8G230000	-1.84341	1.00×10-4	1.32×10-3	-2.21313	5.00×10-5	4.10×10-4	-1.83681	2.50×10-4	4.08×10-3	glycosyl hydrolase family 3 protein, putative, expressed
Seita.3G055100	-4.95488	7.80×10-3	4.31×10-2	-1.45547	9.00×10-4	5.08×10-3	-2.25867	4.25×10-3	3.79×10-2	expressed protein
Seita.4G198800	-1.8952	5.00×10-5	7.18×10-4	-1.00722	4.50×10-4	2.82×10-3	-2.10943	1.50×10-4	2.70×10-3	prenyltransferase, putative, expressed
Seita.2G197500	-3.56146	5.00×10-5	7.18×10-4	-2.47197	5.00×10-5	4.10×10-4	-2.3467	5.00×10-5	1.07×10-3	integral membrane protein, putative, expressed
Seita.9G256700	-1.19246	6.00×10-4	5.83×10-3	-1.29671	5.00×10-5	4.10×10-4	-1.58568	5.00×10-5	1.07×10-3	decarboxylase, putative, expressed
Seita.8G232500	-1.42824	5.00×10-5	7.18×10-4	-2.5586	5.00×10-5	4.10×10-4	-2.86002	5.00×10-5	1.07×10-3	protein kinase family protein, putative, expressed
Seita.5G390100	-1.67736	5.00×10-5	7.18×10-4	-2.8231	5.00×10-5	4.10×10-4	-1.40327	5.00×10-5	1.07×10-3	glycosyl hydrolase, putative, expressed
Seita.5G404900	-1.85553	9.50×10-4	8.45×10-3	-4.25408	5.00×10-5	4.10×10-4	-4.4003	5.00×10-5	1.07×10-3	gibberellin 20 oxidase 2, putative, expressed
Seita.2G295600	-2.38704	1.00×10-4	1.32×10-3	-1.09686	5.00×10-5	4.10×10-4	-1.82605	3.45×10-3	3.23×10-2	OsSAUR53 - Auxin-responsive SAUR gene family member, expressed
Seita.5G238500	-1.51696	5.00×10-5	7.18×10-4	-2.11699	5.00×10-5	4.10×10-4	-3.71833	5.00×10-5	1.07×10-3	MYB family transcription factor, putative, expressed
Seita.3G111200	-1.65318	3.55×10-3	2.36×10-2	-2.85902	5.00×10-5	4.10×10-4	-2.54504	2.20×10-3	2.32×10-2	6-phosphofructokinase, putative, expressed
Seita.5G008200	-1.6587	5.00×10-5	7.18×10-4	-1.16469	5.00×10-5	4.10×10-4	-1.27799	5.00×10-5	1.07×10-3	ethylene-responsive protein related, putative, expressed
Seita.5G384100	-1.92597	5.00×10-5	7.18×10-4	-1.13237	5.00×10-5	4.10×10-4	-1.47413	5.00×10-5	1.07×10-3	alpha-glucan phosphorylast isozyme, putative, expressed
Seita.2G298300	-1.67154	5.00×10-5	7.18×10-4	-1.62748	5.00×10-5	4.10×10-4	-1.19166	6.50×10-4	8.81×10-3	flavin-containing monooxygenase family protein, putative, expressed
Seita.5G455300	-2.3353	5.00×10-5	7.18×10-4	-1.76422	5.00×10-5	4.10×10-4	-1.29908	5.00×10-5	1.07×10-3	OsRR4 type-A response regulator, expressed
Seita.5G422700	-1.01378	4.00×10-4	4.20×10-3	-1.46771	5.00×10-5	4.10×10-4	-1.66998	5.00×10-5	1.07×10-3	-
Seita.9G263100	-1.06415	6.50×10-4	6.22×10-3	-1.22618	5.00×10-5	4.10×10-4	-2.12311	5.00×10-5	1.07×10-3	chitinase 2, putative, expressed
Seita.5G064500	-1.08095	3.50×10-4	3.77×10-3	-1.17584	5.00×10-5	4.10×10-4	-1.21783	1.00×10-4	1.92×10-3	cysteine synthase, mitochondrial precursor, putative, expressed
Seita.2G342300	-1.75433	5.00×10-5	7.18×10-4	-1.98472	7.50×10-4	4.34×10-3	-5.70435	5.00×10-5	1.07×10-3	TKL_IRAK_DUF26-ld.3 - DUF26 kinases have homology to DUF26 containing loci, expressed
Seita.6G008000	-1.50762	5.00×10-4	5.04×10-3	-1.44455	5.00×10-5	4.10×10-4	-1.44211	3.20×10-3	3.07×10-2	invertase/pectin methylesterase inhibitor family protein, putative, expressed
Seita.5G220500	-1.13229	2.50×10-4	2.86×10-3	-1.74948	5.00×10-5	4.10×10-4	-1.76245	5.00×10-5	1.07×10-3	inactive receptor kinase At2g26730 precursor, putative, expressed
Seita.4G109200	-1.13131	5.00×10-5	7.18×10-4	-1.66353	5.00×10-5	4.10×10-4	-1.44553	5.00×10-5	1.07×10-3	protein kinase domain containing protein, expressed
Seita.8G049300	-2.36935	5.00×10-5	7.18×10-4	-1.12639	5.00×10-5	4.10×10-4	-1.83075	3.00×10-4	4.76×10-3	amidase family protein, putative, expressed
Seita.3G124300	-1.13043	5.00×10-5	7.18×10-4	-1.05294	5.00×10-5	4.10×10-4	-1.24829	5.00×10-5	1.07×10-3	RNA polymerase sigma factor, putative, expressed
Seita.9G465200	-1.12877	3.00×10-4	3.31×10-3	-2.45046	5.00×10-5	4.10×10-4	-1.92028	5.00×10-5	1.07×10-3	expressed protein
Seita.5G363100	-3.6613	5.00×10-5	7.18×10-4	-2.41464	5.00×10-5	4.10×10-4	-3.52033	5.00×10-5	1.07×10-3	expansin precursor, putative, expressed
Seita.3G082100	-1.43551	5.00×10-5	7.18×10-4	-2.93488	5.00×10-5	4.10×10-4	-2.25232	5.00×10-5	1.07×10-3	aquaporin protein, putative, expressed
Seita.2G313800	-2.47251	5.00×10-5	7.18×10-4	-1.49492	5.00×10-5	4.10×10-4	-2.6862	5.00×10-5	1.07×10-3	glycosyl hydrolases family 16, putative, expressed
Seita.5G381500	-1.28059	5.00×10-5	7.18×10-4	-2.36683	5.00×10-5	4.10×10-4	-2.92717	5.00×10-5	1.07×10-3	transketolase, chloroplast precursor, putative, expressed
Seita.3G360900	-2.43773	5.00×10-5	7.18×10-4	-1.66351	5.00×10-5	4.10×10-4	-1.41009	5.00×10-4	7.22×10-3	pumilio-family RNA binding repeat domain containing protein, expressed
Seita.1G218500	-1.08818	9.00×10-4	8.11×10-3	-1.96859	5.00×10-5	4.10×10-4	-1.71549	1.15×10-3	1.39×10-2	high affinity nitrate transporter, putative, expressed
Seita.5G354500	-1.23808	5.00×10-5	7.18×10-4	-1.09	5.00×10-5	4.10×10-4	-1.1011	5.00×10-5	1.07×10-3	chloroplast ribonuclease III domain protein, putative, expressed
Seita.1G236100	-1.29875	5.00×10-5	7.18×10-4	-1.84394	5.00×10-5	4.10×10-4	-2.16608	5.00×10-5	1.07×10-3	response regulator receiver domain containing protein, expressed
Seita.5G099200	-1.78086	5.00×10-5	7.18×10-4	-1.74601	5.00×10-5	4.10×10-4	-1.22923	1.00×10-4	1.92×10-3	mitochondrial glycoprotein, putative, expressed
Seita.9G515800	-1.40975	4.00×10-4	4.20×10-3	-2.61828	5.00×10-5	4.10×10-4	-1.81472	3.00×10-4	4.76×10-3	expressed protein
Seita.3G079000	-1.02287	1.10×10-3	9.51×10-3	-1.97403	5.00×10-5	4.10×10-4	-1.73404	5.00×10-5	1.07×10-3	expressed protein
Seita.3G105500	-1.45419	1.00×10-4	1.32×10-3	-2.17636	5.00×10-5	4.10×10-4	-2.39155	5.00×10-5	1.07×10-3	DUF581 domain containing protein, expressed
Seita.3G318200	-4.04862	5.00×10-5	7.18×10-4	-1.50519	5.00×10-5	4.10×10-4	-1.32003	5.05×10-3	4.33×10-2	OsWAK95 - OsWAK receptor-like protein kinase, expressed
Seita.4G153900	-1.02558	1.10×10-3	9.51×10-3	-2.61437	5.00×10-5	4.10×10-4	-2.19065	5.00×10-5	1.07×10-3	expressed protein
Seita.9G344400	-1.32499	5.00×10-5	7.18×10-4	-1.3532	5.00×10-5	4.10×10-4	-1.19884	1.00×10-4	1.92×10-3	expressed protein
Seita.5G087900	-1.08686	2.90×10-3	2.02×10-2	-1.13344	5.00×10-5	4.10×10-4	-1.45718	2.90×10-3	2.86×10-2	expressed protein
Seita.8G080800	-2.36717	5.00×10-5	7.18×10-4	-1.73756	1.00×10-4	7.66×10-4	-2.42341	4.50×10-4	6.62×10-3	ZF-HD protein dimerisation region containing protein, expressed
Seita.5G346700	-1.44304	5.00×10-5	7.18×10-4	-1.57756	5.00×10-5	4.10×10-4	-1.72015	5.00×10-5	1.07×10-3	OsSub6 - Putative Subtilisin homologue, expressed
Seita.8G135100	-1.46267	1.50×10-4	1.87×10-3	-2.81867	5.00×10-5	4.10×10-4	-2.67862	5.00×10-5	1.07×10-3	membrane associated DUF588 domain containing protein, putative, expressed
Seita.4G199600	-1.91242	5.00×10-5	7.18×10-4	-2.84464	5.00×10-5	4.10×10-4	-1.8388	5.00×10-5	1.07×10-3	FAD dependent oxidoreductase domain containing protein, expressed
Seita.2G426000	-1.61301	5.00×10-5	7.18×10-4	-1.95799	5.00×10-5	4.10×10-4	-1.38846	5.00×10-5	1.07×10-3	OsGH3.11 - Probable indole-3-acetic acid-amido synthetase, expressed
Seita.5G285600	-2.06347	5.00×10-5	7.18×10-4	-2.30753	5.00×10-5	4.10×10-4	-1.70224	5.00×10-5	1.07×10-3	DNA-binding protein DSP1, putative, expressed
NA and inf indicated that fold change (FC) is 0 and infinity, respectively.
