# Supplementary material for: Transcriptomic studies reveal a key metabolic pathway contributing to a well-maintained photosynthetic system under drought stress in foxtail millet (Setaria italica L.)
Source: PeerJ. 2018 May 8;6:e4752. doi: 10.7717/peerj.4752 (PMC5947103; doi:10.7717/peerj.4752)
Supplement: Table S14 [file peerj-06-4752-s014.xlsx]

## Sheet: Table S14
Table S14. KEGG analysis of E1-specific DEGs after drought stress.
Pathway ID	Pathway	Number in input list	P-value	FDR
ko00360	Phenylalanine metabolism	33	2.60×10-8	2.57×10-6
ko00940	Phenylpropanoid biosynthesis	37	1.71×10-7	8.44×10-6
ko01110	Biosynthesis of secondary metabolites	101	1.01×10-6	2.63×10-5
ko04075	Plant hormone signal transduction	35	1.06×10-6	2.63×10-5
ko00591	Linoleic acid metabolism	5	1.85×10-3	3.43×10-2
ko00564	Glycerophospholipid metabolism	14	2.08×10-3	3.43×10-2
