# Supplementary material for: Transcriptomic studies reveal a key metabolic pathway contributing to a well-maintained photosynthetic system under drought stress in foxtail millet (Setaria italica L.)
Source: PeerJ. 2018 May 8;6:e4752. doi: 10.7717/peerj.4752 (PMC5947103; doi:10.7717/peerj.4752)
Supplement: Table S17 [file peerj-06-4752-s017.xlsx]

## Sheet: Table S17
Table S17. Pearson correlation coefficients of physiological data and the expression data of photosynthesis-related DEGs.
	Seita.2G303000	Seita.5G234700	Seita.5G235200	Seita.6G024800	Seita.9G545500
A(µmol m⁻² s⁻¹)	0.998*	/	0.998*	/	/
PhiPSII	/	0.999*	/	-0.997*	-1.000*
* indicate significance level at P = 0.05 (2-tailed).
